# Supplementary material for: Isolation and prolonged expansion of oral mesenchymal stem cells under clinical-grade, GMP-compliant conditions differentially affects “stemness” properties
Source: PubMed Central journal article supplement (PMC5667471; doi:10.1186/s13287-017-0705-0), 2017-11-02

# CD73

CCM

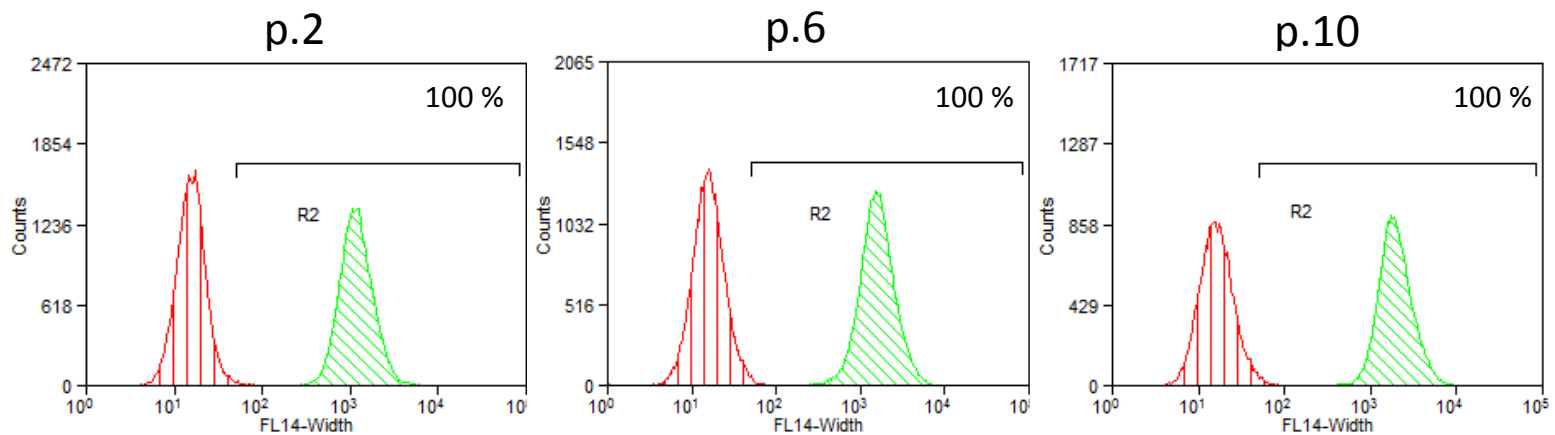

StemMacs

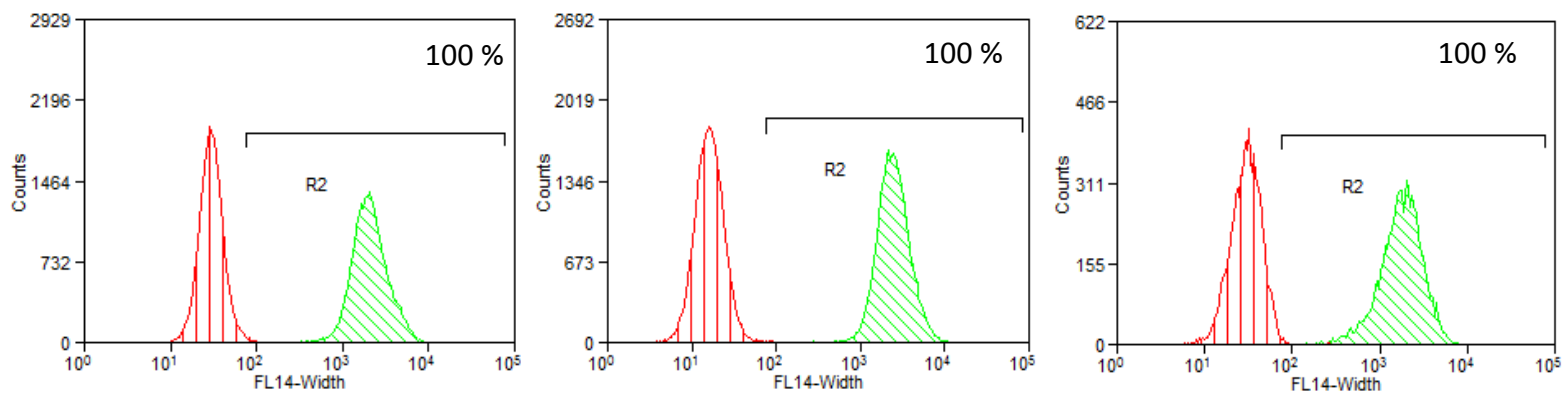

StemPro

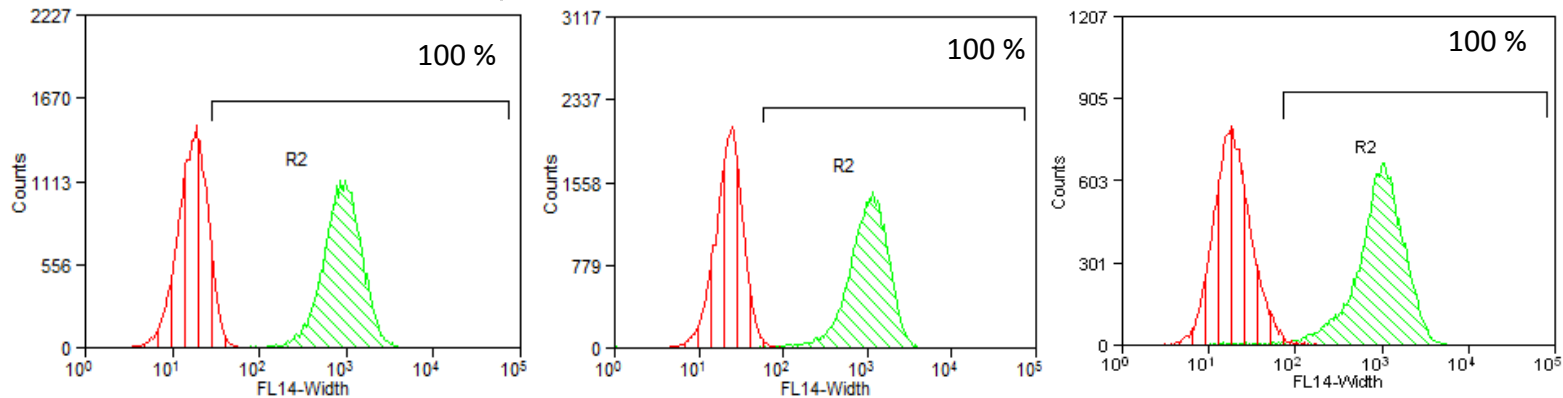

# CD90

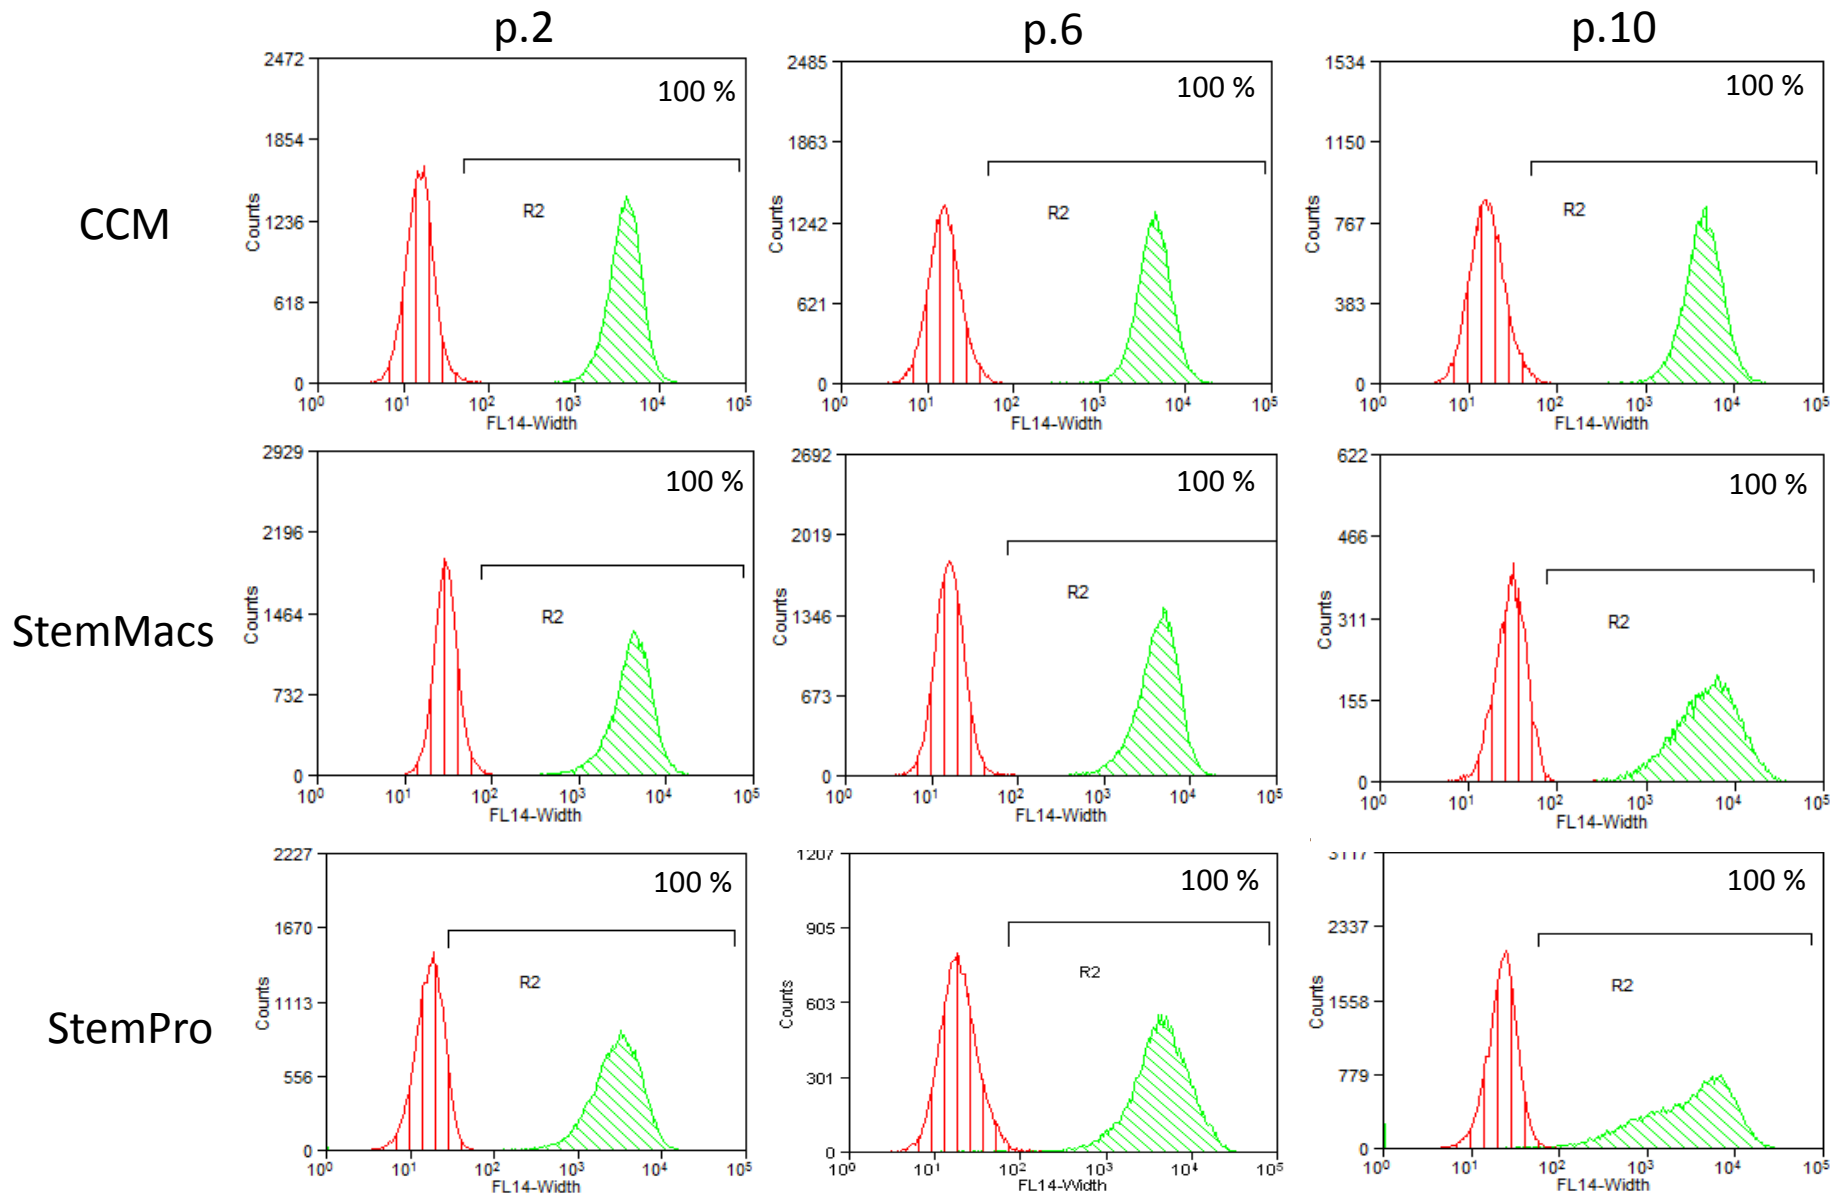

# CD81

CCM

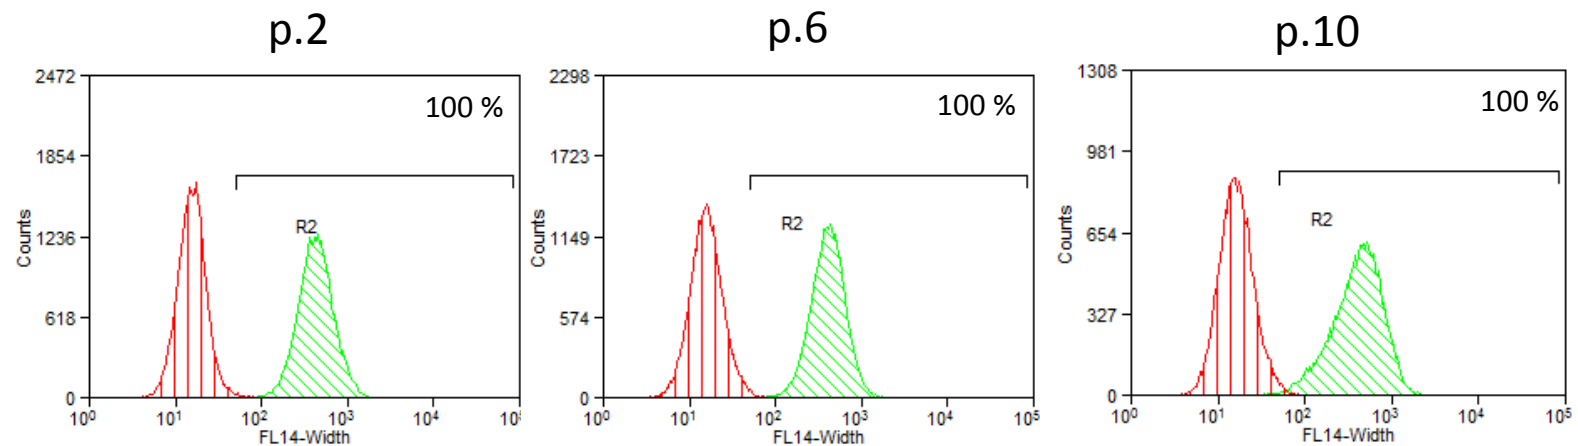

StemMacs

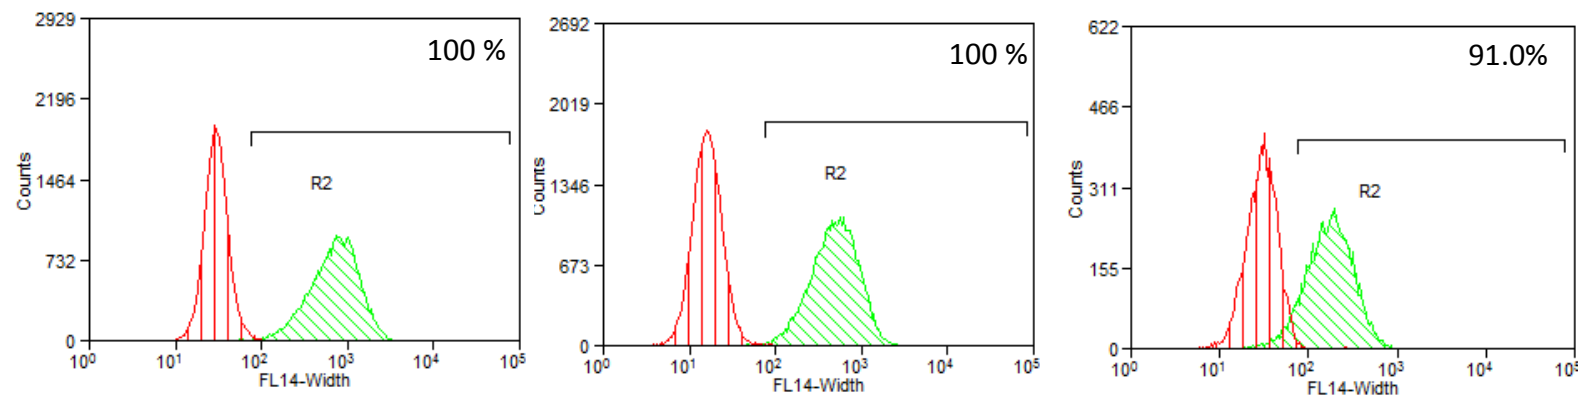

StemPro

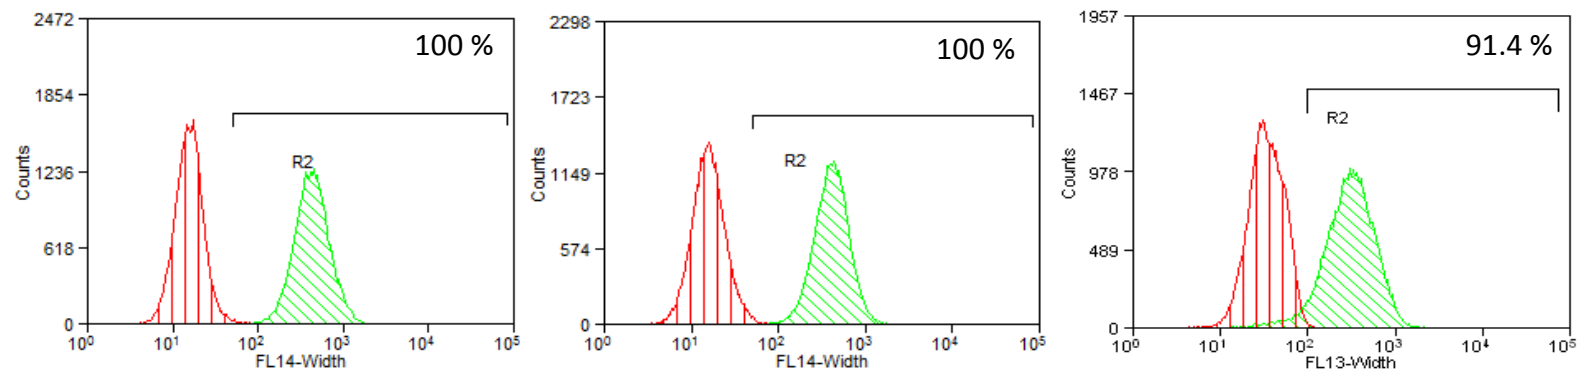

# CD49f

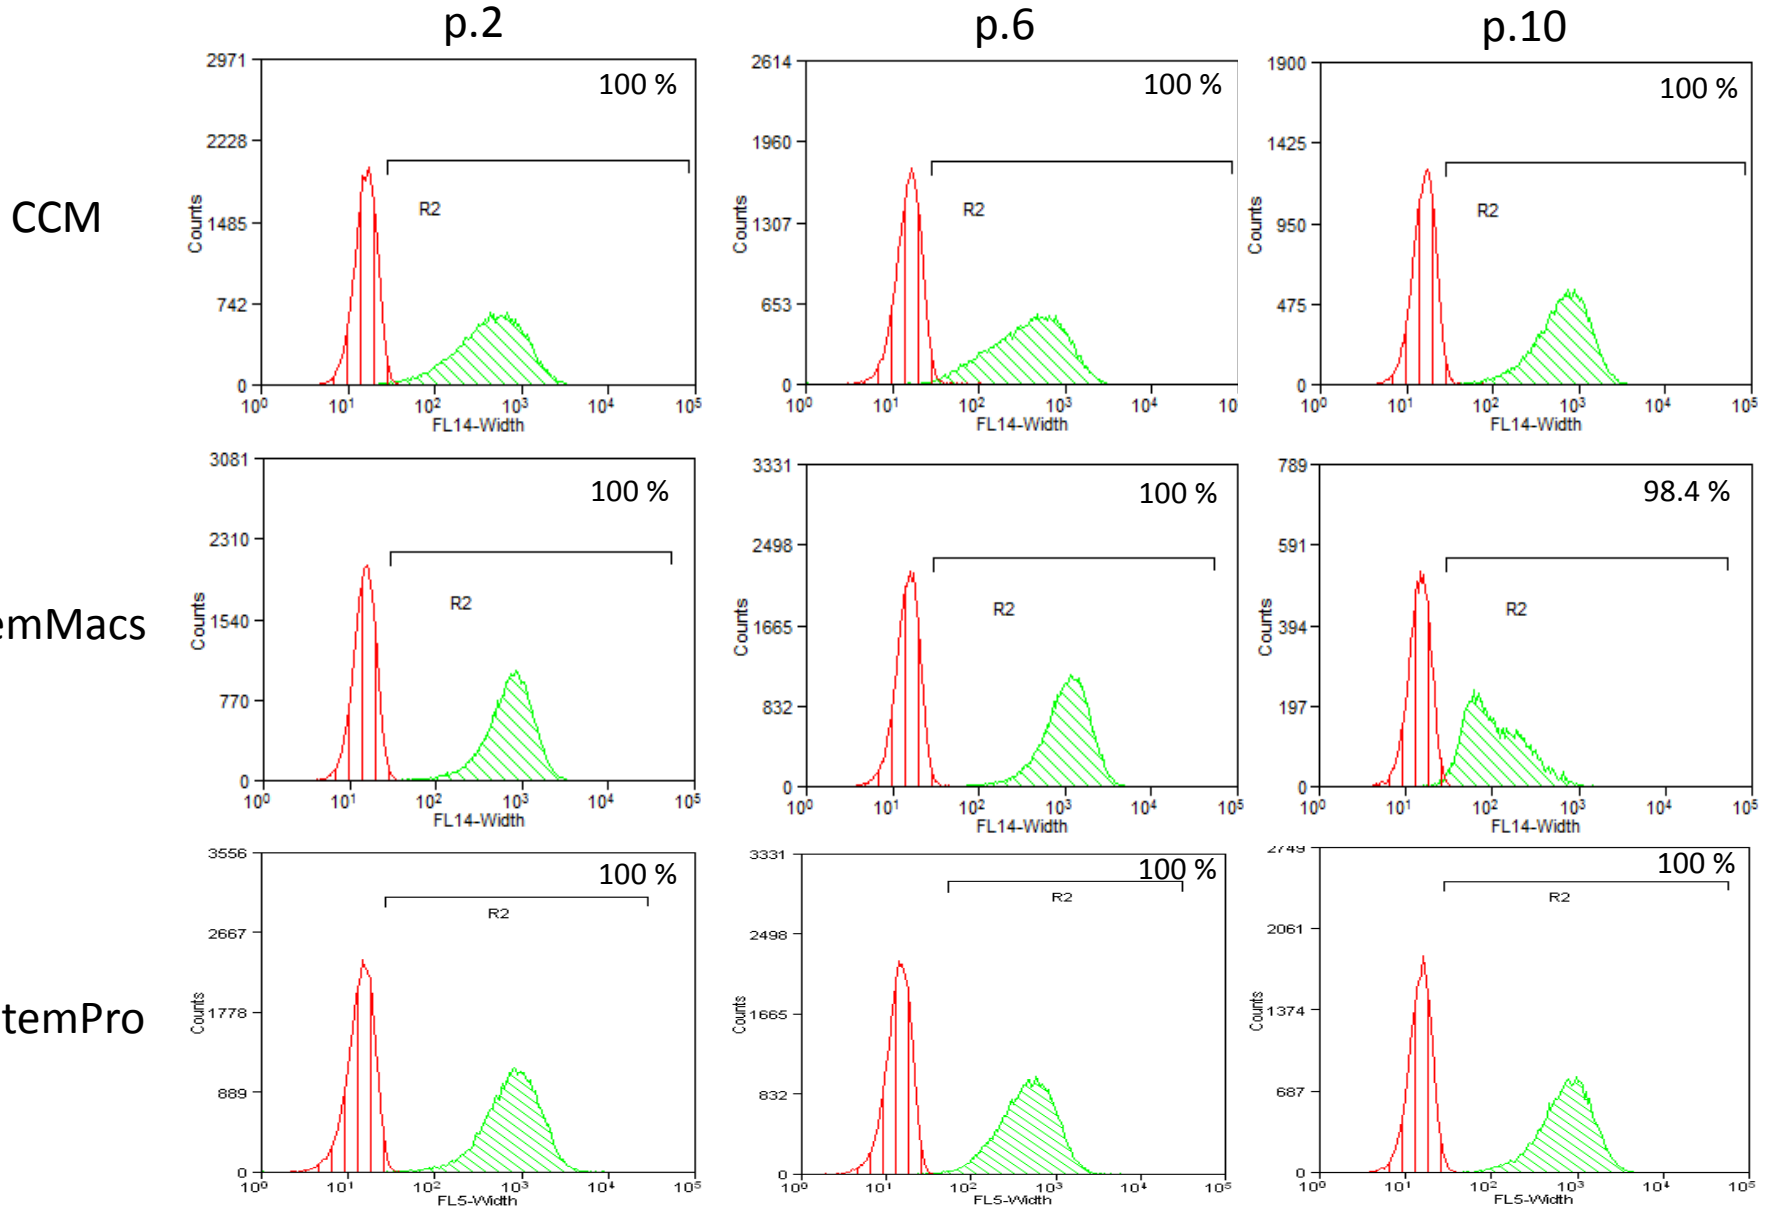

# CD146

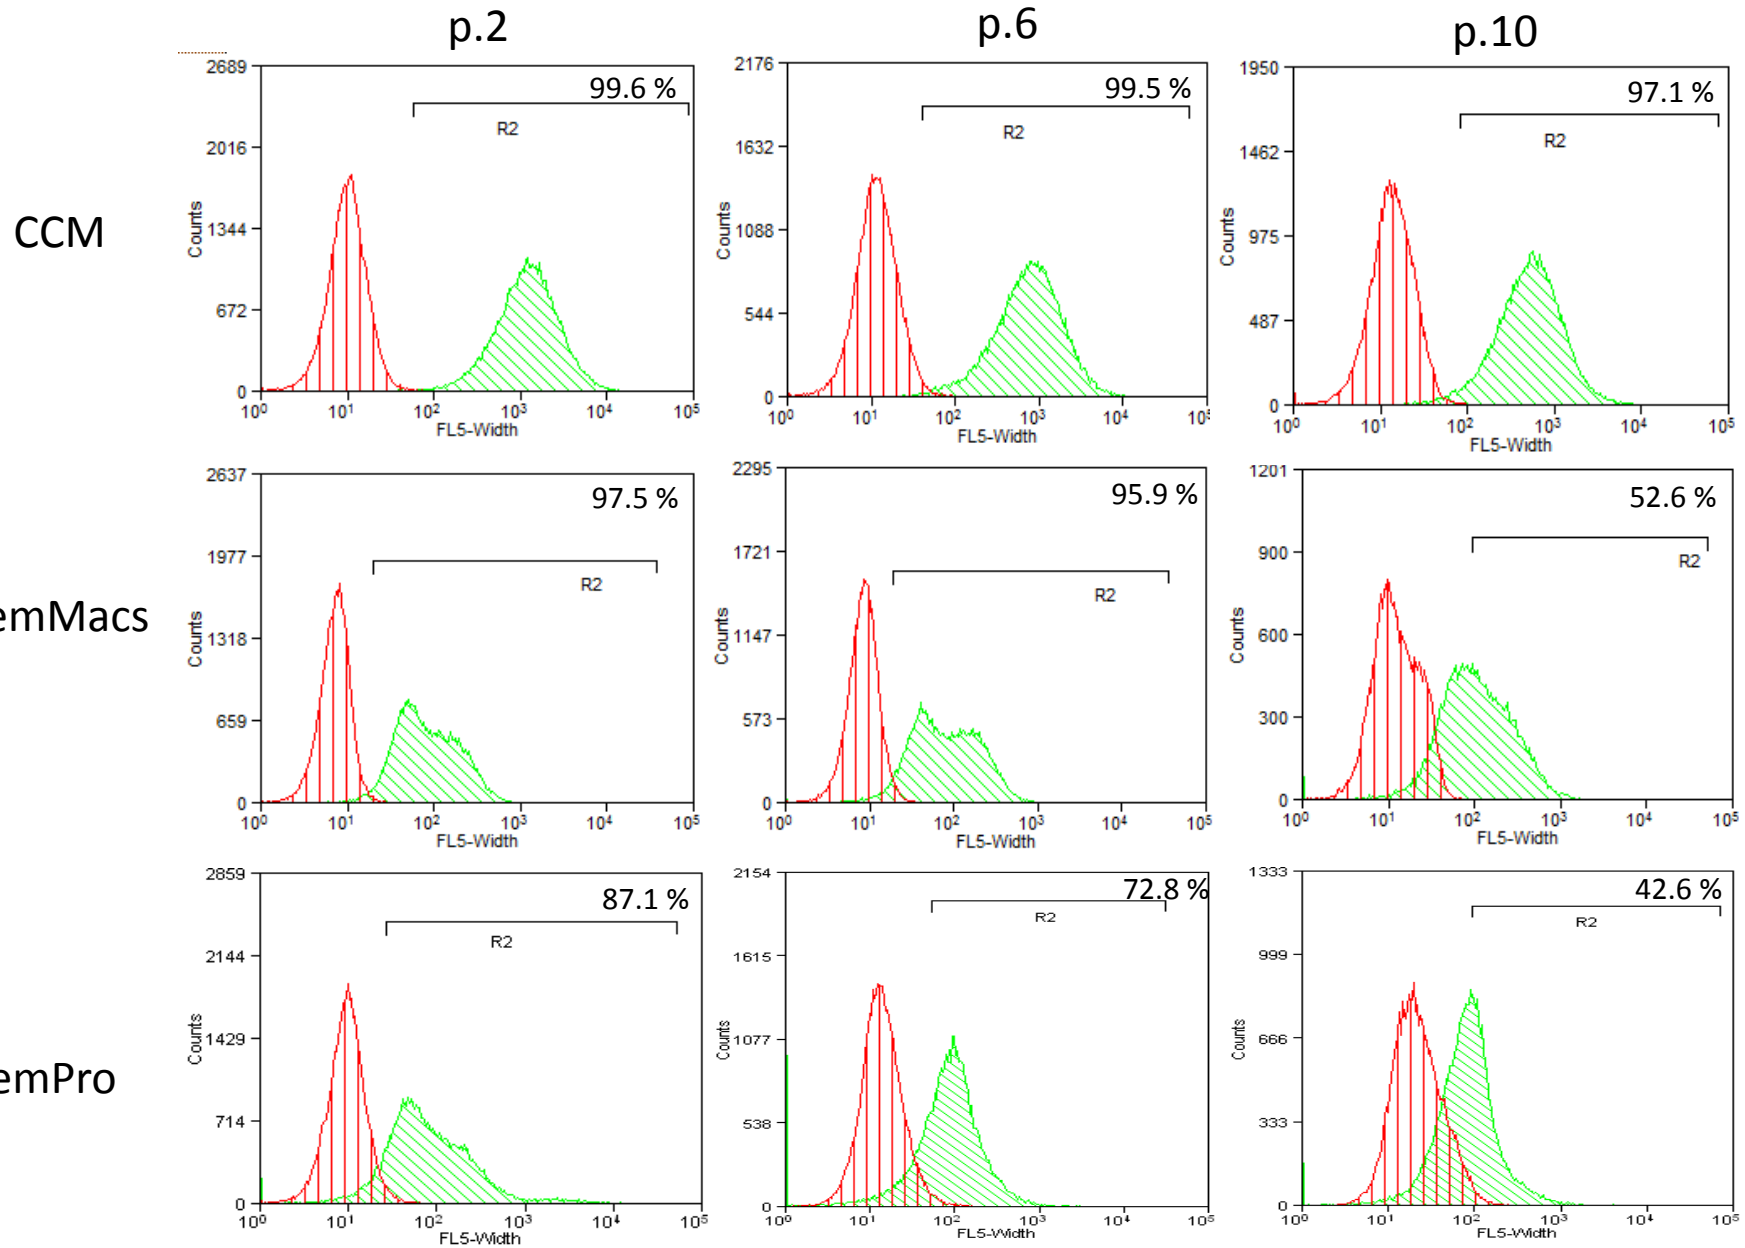

# CD105

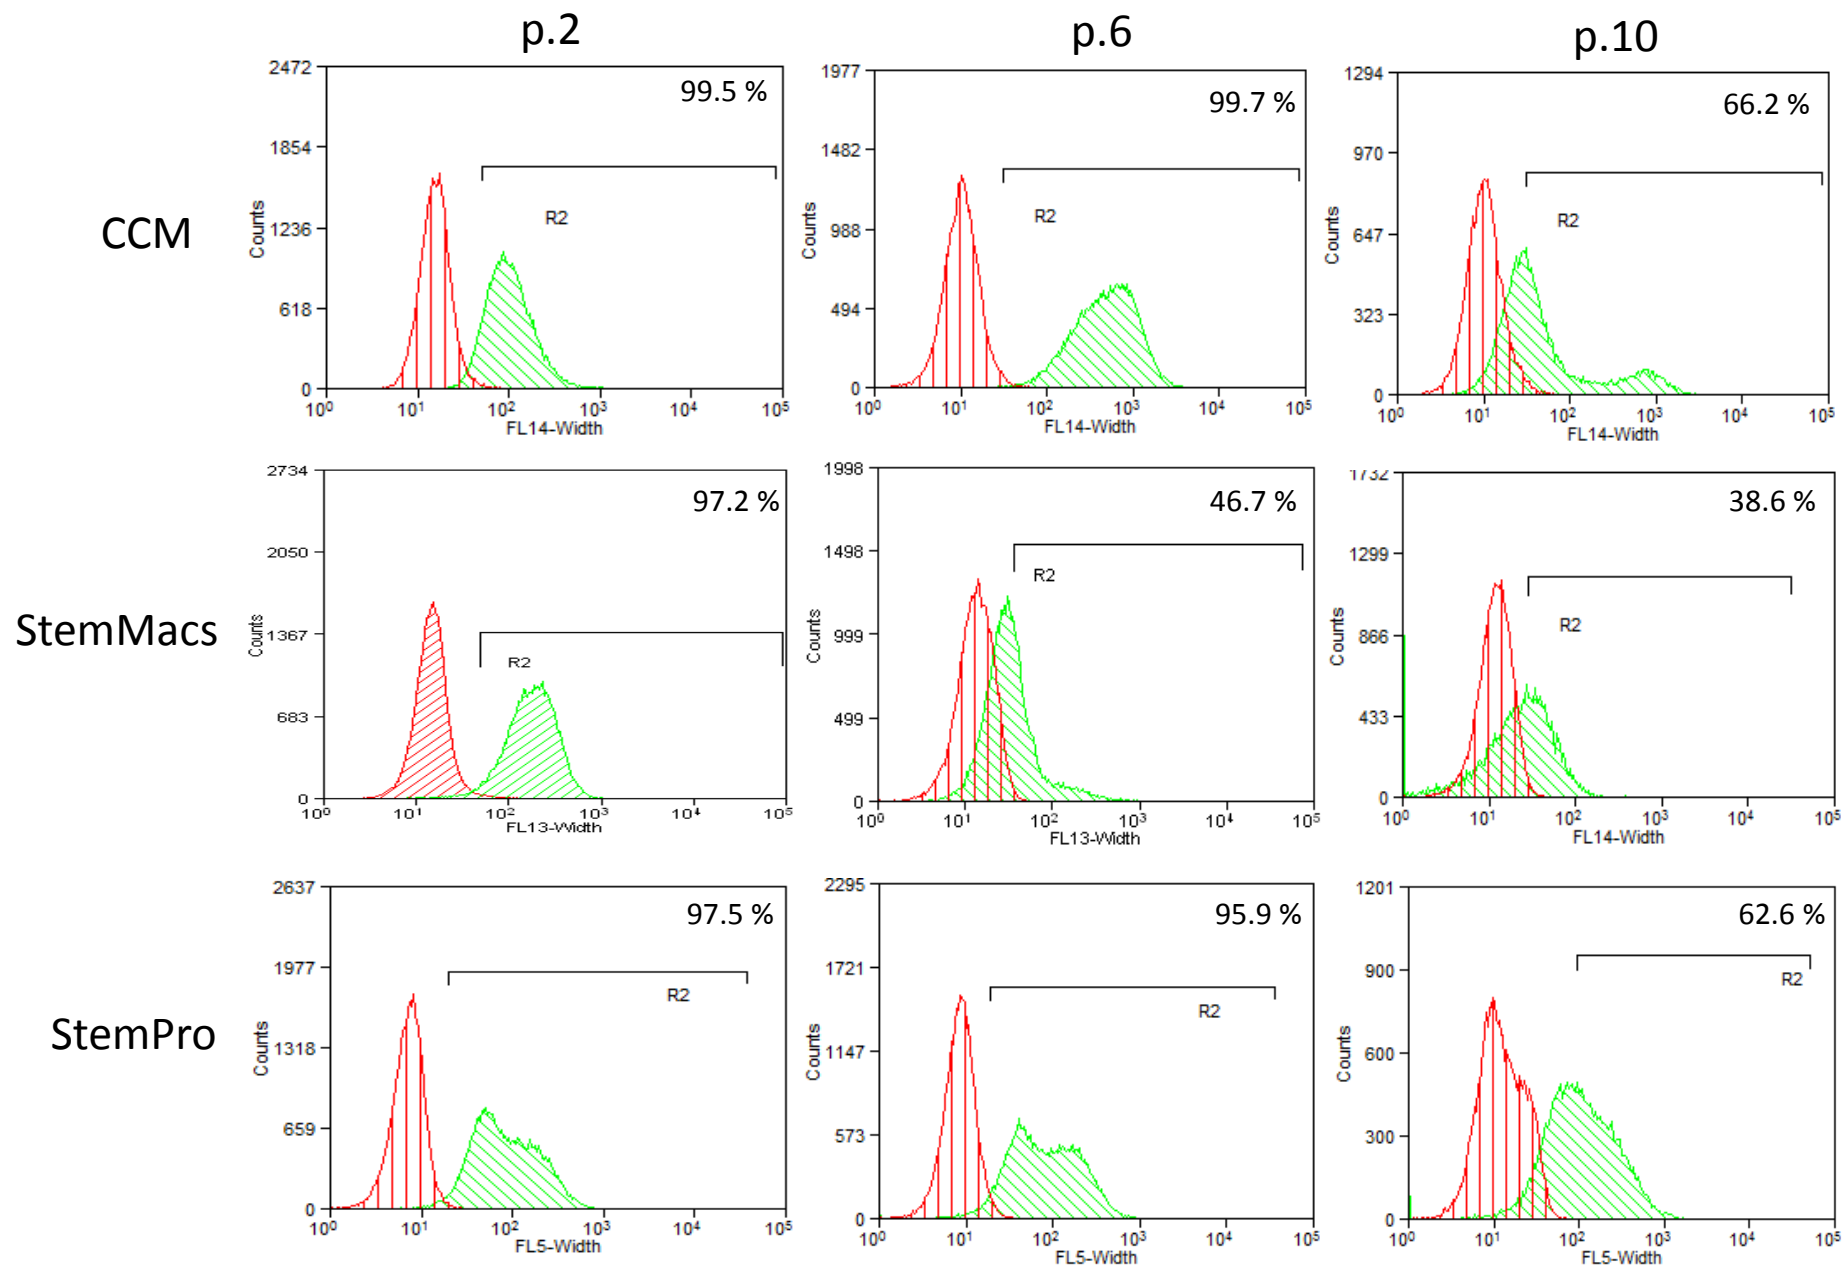

# STRO-1

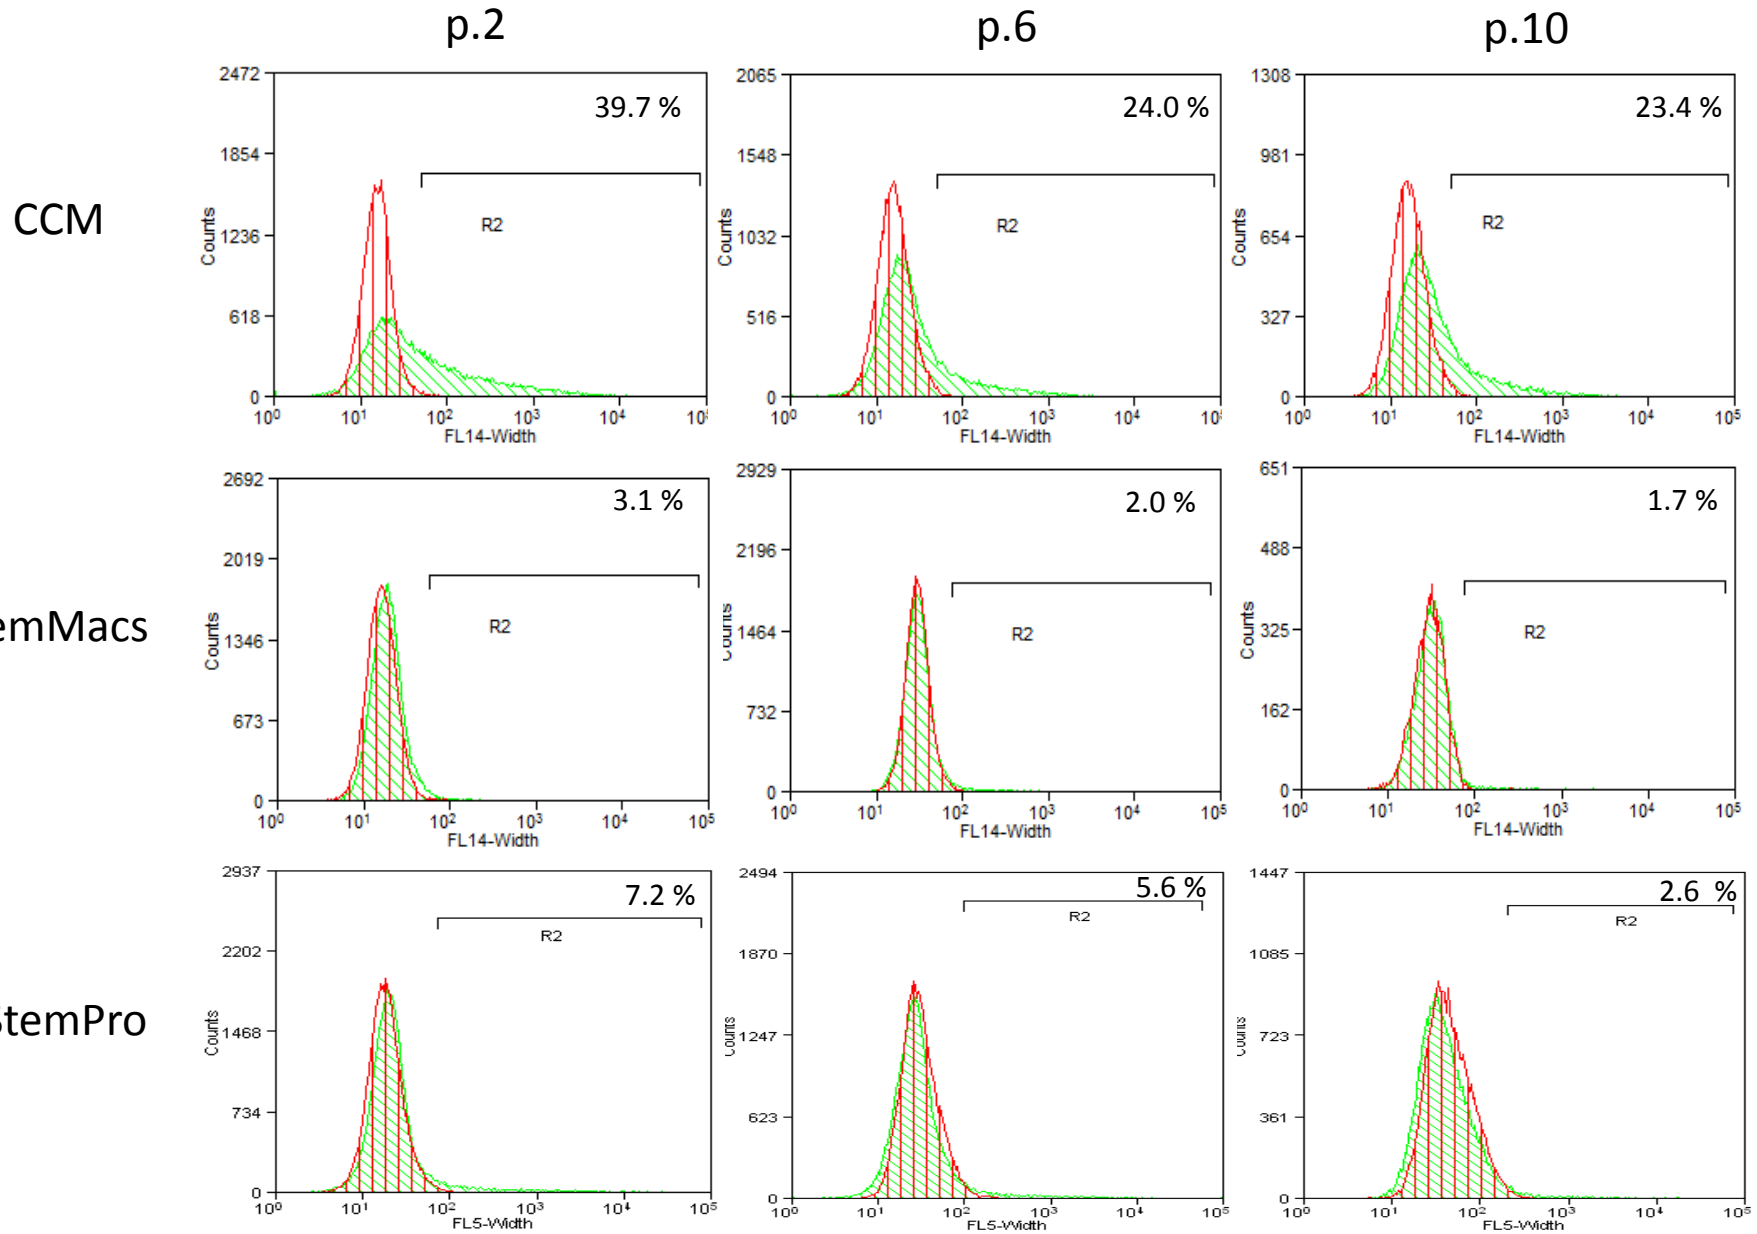

# SSEA-4

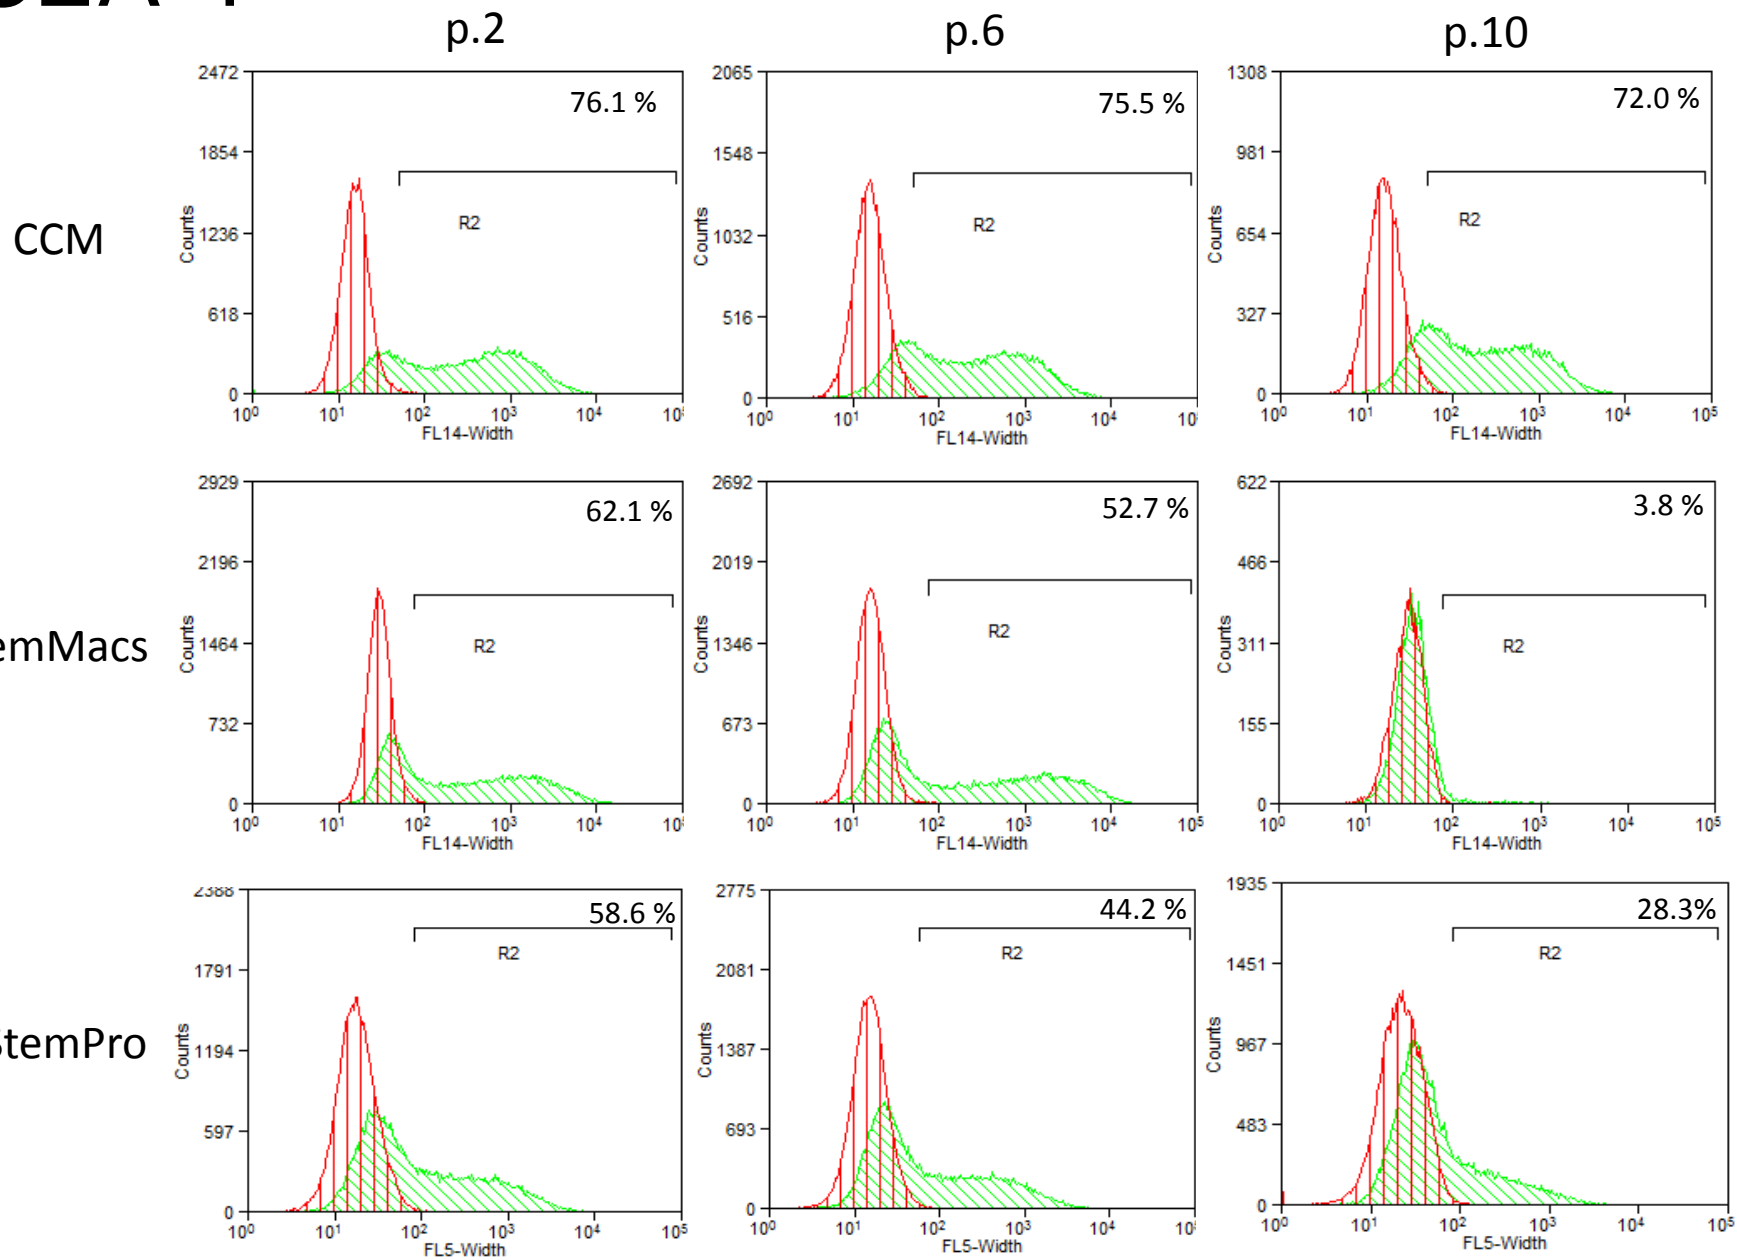



# SSEA-1

CCM

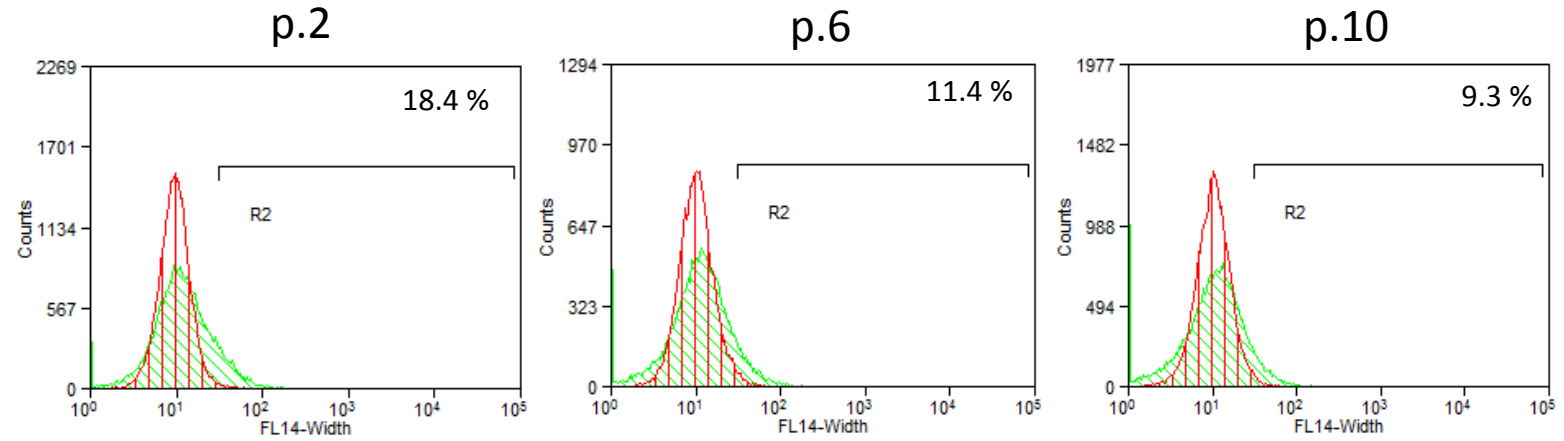

StemMacs

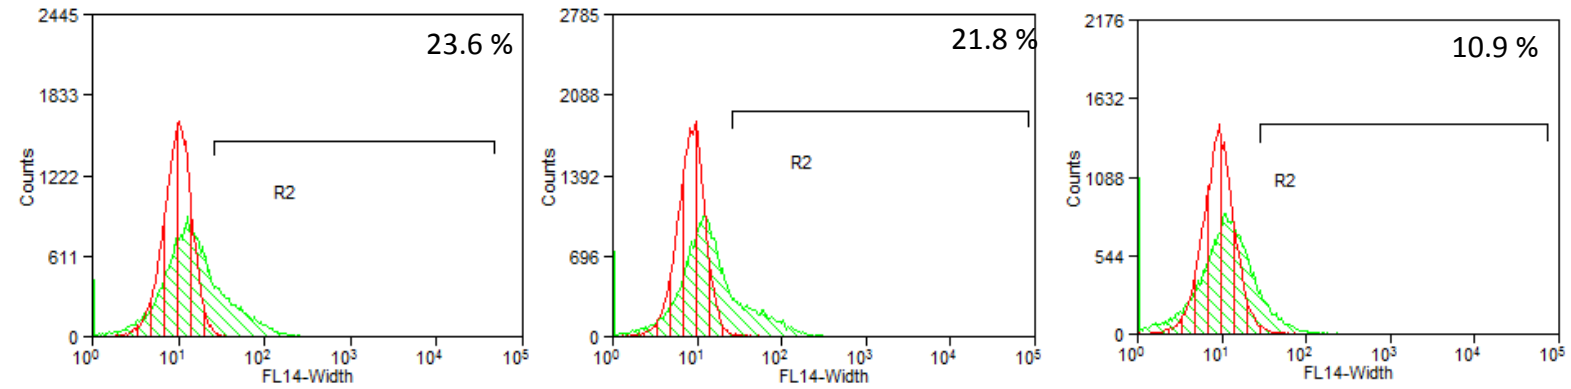

StemPro

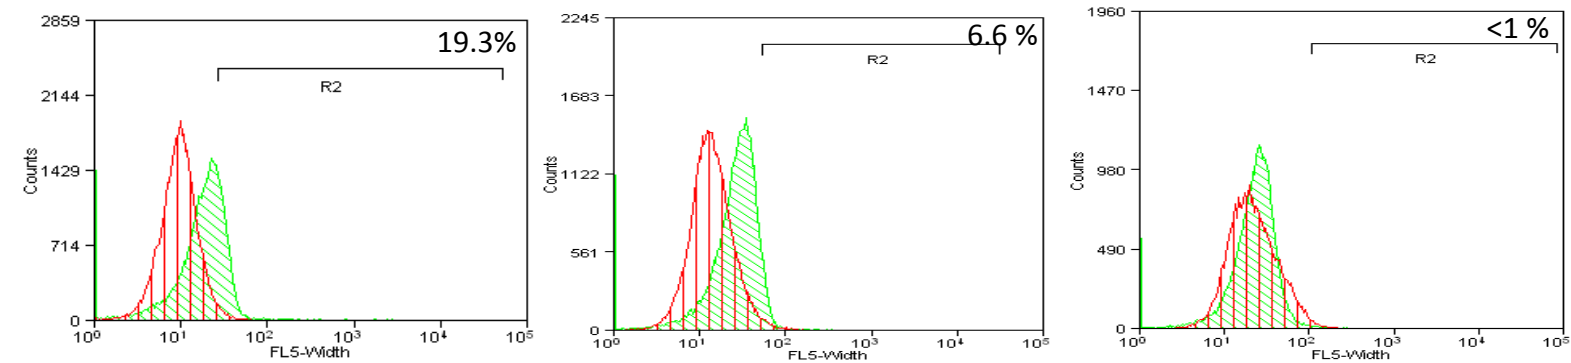

# CD34

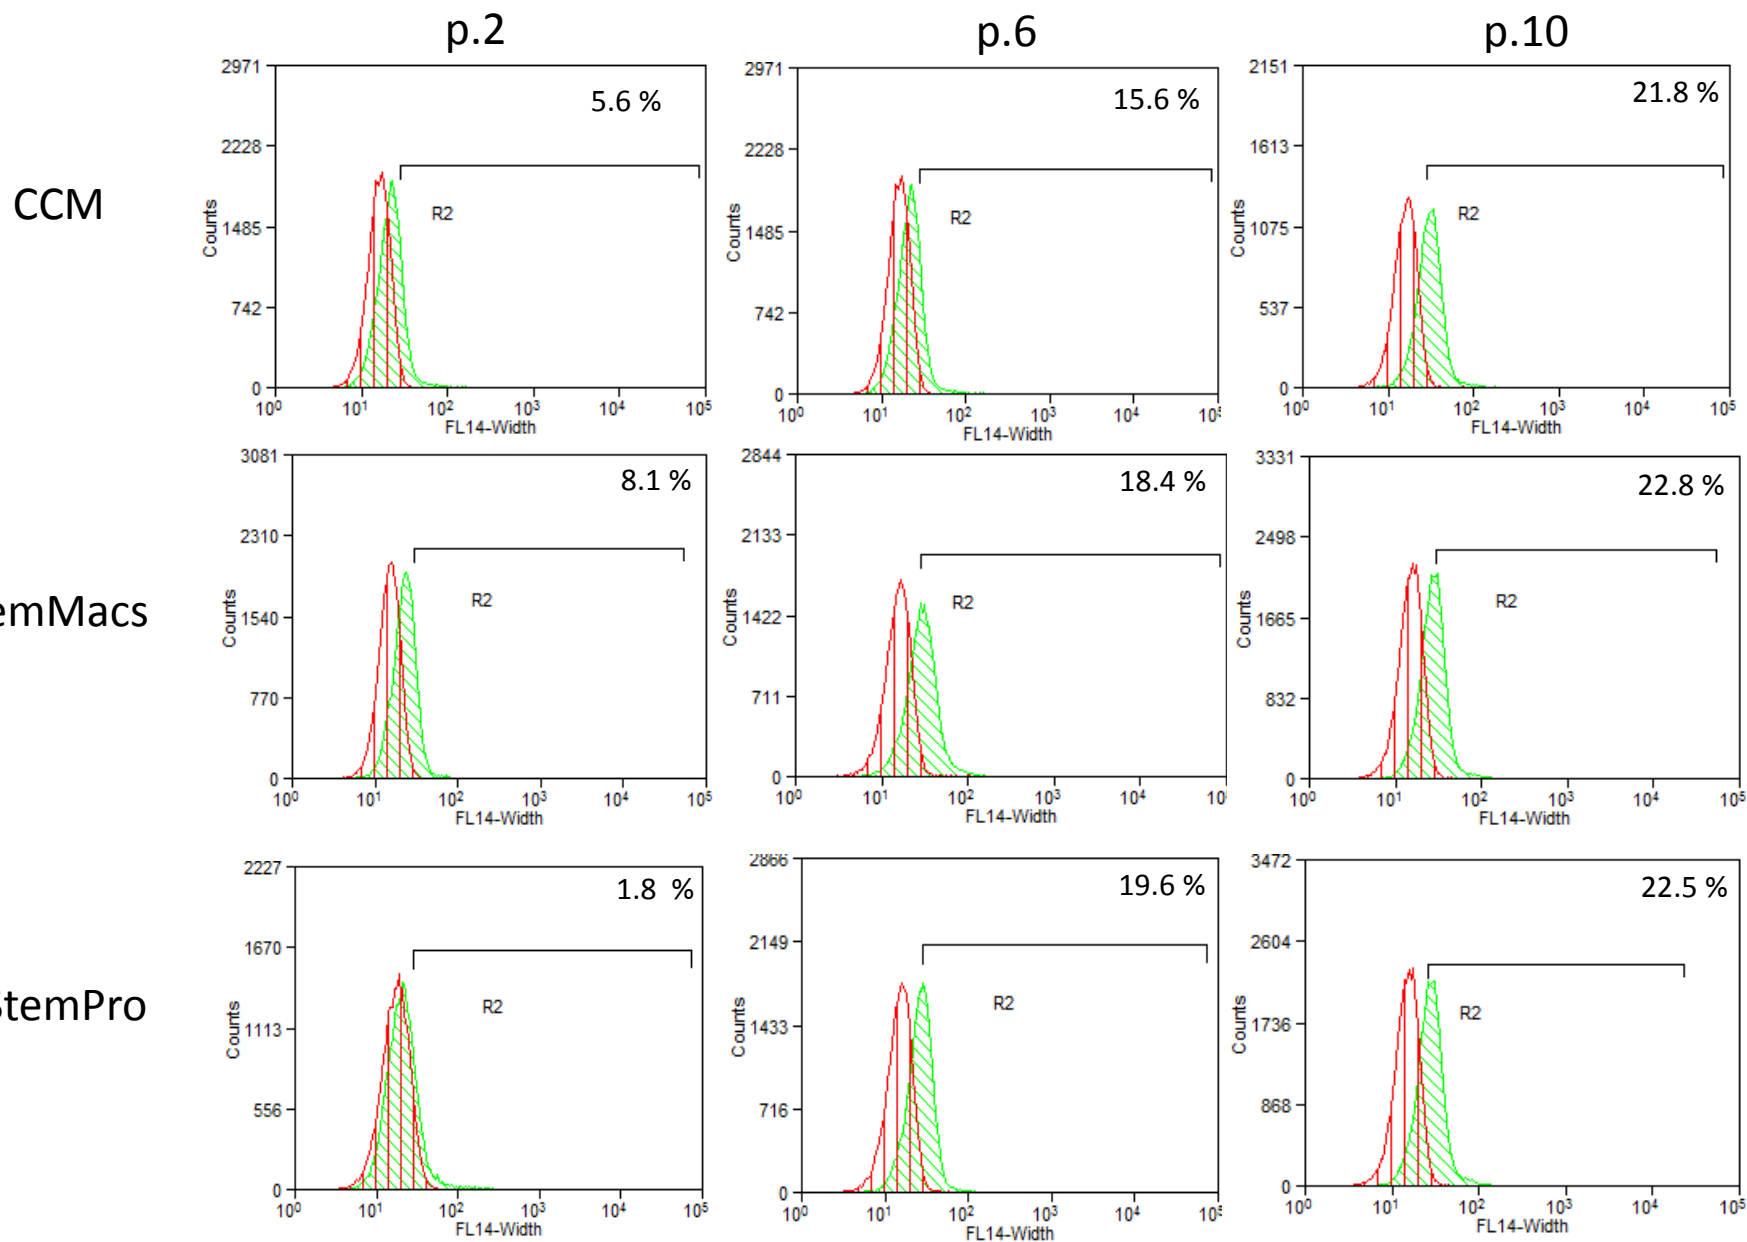

Supplement: 13287_2017_705_MOESM1_ESM.pdf [file 13287_2017_705_MOESM1_ESM.pdf]
